# Supplementary material
Source: MDPI journal article supplement (https://www.mdpi.com/2071-1050/10/7/2373)
Supplement: s1 [file s1]

**S2 Table.** Classification of three sectors of China.

| Three strata of industry | GB/T 4754—2011                                         |      | Sector                                                                                              |
|--------------------------|--------------------------------------------------------|------|-----------------------------------------------------------------------------------------------------|
|                          | Category                                               | Code |                                                                                                     |
| Primary Industry         | A. Agriculture, Forestry, Animal Husbandry and Fishery | 1    | Farming                                                                                             |
|                          |                                                        | 2    | Forestry                                                                                            |
|                          |                                                        | 3    | Animal Husbandry                                                                                    |
|                          |                                                        | 4    | Fishery                                                                                             |
| Secondary Industry       | B. Mining                                              | 6    | Mining and Washing of Coal                                                                          |
|                          |                                                        | 7    | Extraction of Petroleum and Natural Gas                                                             |
|                          |                                                        | 8    | Mining and Processing of Ferrous Metal Ores                                                         |
|                          |                                                        | 9    | Mining and Processing of Non-Ferrous Metal Ores                                                     |
|                          |                                                        | 10   | Mining and Processing of Non-metal Ores                                                             |
|                          |                                                        | 12   | Other Minerals Mining and Dressing                                                                  |
|                          | C. Manufacturing                                       | 13   | Farm Products Processing                                                                            |
|                          |                                                        | 14   | Food Manufacturing                                                                                  |
|                          |                                                        | 15   | Wine, Beverage and Refined Tea Manufacturing                                                        |
|                          |                                                        | 16   | Tobacco Products Manufacturing                                                                      |
|                          |                                                        | 17   | Manufacture of Textile                                                                              |
|                          |                                                        | 18   | Manufacture of Textile, Wearing Apparel and Accessories                                             |
|                          |                                                        | 19   | Manufacture of Leather, Fur, Feather and Related Products and Footwear                              |
|                          |                                                        | 20   | Processing of Timber, Manufacture of Wood, Bamboo, Rattan, Palm and Straw Products                  |
|                          |                                                        | 21   | Furniture Manufacturing                                                                             |
|                          |                                                        | 22   | Paper Making and Paper Products                                                                     |
|                          |                                                        | 23   | Printing and Record Medium Reproduction                                                             |
|                          |                                                        | 24   | Manufacture of Articles for Culture, Education, Arts and Crafts, Sport and Entertainment Activities |
|                          |                                                        | 25   | Processing of Petroleum, Coking and Processing of Nuclear Fuel                                      |
|                          |                                                        | 26   | Manufacture of Raw Chemical Materials and Chemical Products                                         |
|                          |                                                        | 27   | Medical and Pharmaceutical Products                                                                 |
|                          |                                                        | 28   | Chemical Fiber                                                                                      |
|                          |                                                        | 29   | Rubber and Plastic Products                                                                         |

|                   |                                                              |    |                                                                       |
|-------------------|--------------------------------------------------------------|----|-----------------------------------------------------------------------|
|                   |                                                              | 30 | Nonmetal Mineral Products                                             |
|                   |                                                              | 31 | Smelting and Pressing of Ferrous Metals                               |
|                   |                                                              | 32 | Smelting and Pressing of Non-ferrous Metals                           |
|                   |                                                              | 33 | Metal Products                                                        |
|                   |                                                              | 34 | Ordinary Machinery Manufacturing                                      |
|                   |                                                              | 35 | Special Purpose Equipment Manufacturing                               |
|                   |                                                              | 36 | Manufacture of Automobiles                                            |
|                   |                                                              | 37 | Manufacture of Railway, Ship, Aerospace and Other Transport Equipment |
|                   |                                                              | 38 | Manufacture of Electrical Machinery and Apparatus                     |
|                   |                                                              | 39 | Telecommunication Equipment, Computer and Other Electronic Product    |
|                   |                                                              | 40 | Manufacture of Measuring Instruments and Machinery                    |
|                   |                                                              | 41 | Other Manufacture                                                     |
|                   |                                                              | 42 | Utilization of Waste Resources                                        |
|                   | D. Production and Supply of Electric, Heat, Gas and Water    | 44 | Production and Supply of Electric Power, Heat Power                   |
|                   |                                                              | 45 | Production and Supply of Gas                                          |
|                   |                                                              | 46 | Production and Supply of Water                                        |
|                   | E. Construction                                              | 47 | Construction of Building                                              |
|                   |                                                              | 48 | Construction of Civil Engineering                                     |
|                   |                                                              | 49 | Construction and Installation                                         |
|                   |                                                              | 50 | Decoration and Others                                                 |
| Tertiary Industry | A. Agricultural Service                                      | 5  | Agricultural Service                                                  |
|                   | B. Support Activities for Mining                             | 11 | Support Activities for Mining                                         |
|                   | C. Repair Service of Metal Products, Machinery and Equipment | 43 | Repair Service of Metal Products, Machinery and Equipment             |
|                   | F. Wholesale and Retail Trades                               | 51 | Wholesale                                                             |
|                   |                                                              | 52 | Retail                                                                |
|                   | G. Transport, Storage and Post                               | 53 | Railways Transport                                                    |
|                   |                                                              | 54 | Road Transport                                                        |
|                   |                                                              | 55 | Water Transport                                                       |
|                   |                                                              | 56 | Air Transport                                                         |
|                   |                                                              | 57 | Pipeline Transport                                                    |
|                   |                                                              | 58 | Handling and Forwarding Agent                                         |
|                   |                                                              | 59 | Storage                                                               |
|                   |                                                              | 60 | Post                                                                  |
|                   | H. Hotels and Catering Services                              | 61 | Hotels                                                                |
|                   |                                                              | 62 | Catering Services                                                     |

|  |                                                                       |    |                                                                              |
|--|-----------------------------------------------------------------------|----|------------------------------------------------------------------------------|
|  | I. Information Transmission, Software and Information Technology      | 63 | Telecommunications, Broadcast Television and Satellite Transmission Services |
|  |                                                                       | 64 | Internet & Other related Services                                            |
|  |                                                                       | 65 | Software Information Technology Service                                      |
|  | J. Financial Intermediation                                           | 66 | Monetary and Financial Services                                              |
|  |                                                                       | 67 | Capital Markets Services                                                     |
|  |                                                                       | 68 | Insurance                                                                    |
|  |                                                                       | 69 | Other Financial Industries                                                   |
|  | K. Real Estate                                                        | 70 | Real Estate                                                                  |
|  | L. Leasing and Business Services                                      | 71 | Leasing Services                                                             |
|  |                                                                       | 72 | Business Services                                                            |
|  | M. Scientific Research and Technical Services                         | 73 | R&D                                                                          |
|  |                                                                       | 74 | Special Technical Services                                                   |
|  |                                                                       | 75 | Service Industry of Scientific and Technological Exchanges and Promotion     |
|  | N. Management of Water Conservancy, Environment and Public Facilities | 76 | Management of Water Conservancy                                              |
|  |                                                                       | 77 | Management of Environment                                                    |
|  |                                                                       | 78 | Management of Public Facilities                                              |
|  | O. Services to Households, Repair and Other Services                  | 79 | Services to Households                                                       |
|  |                                                                       | 80 | Repair of Motor Vehicles, Electronic and Daily Products                      |
|  |                                                                       | 81 | Other Services                                                               |
|  | P. Education                                                          | 82 | Education                                                                    |
|  | Q. Health and Social Services                                         | 83 | Health Services                                                              |
|  |                                                                       | 84 | Social Services                                                              |
|  | R. Culture, Sports and Entertainment                                  | 85 | Press and Publication Industry                                               |
|  |                                                                       | 86 | Radio, Television, Film and Television Recording Industry                    |
|  |                                                                       | 87 | Culture and Arts                                                             |
|  |                                                                       | 88 | Sports                                                                       |
|  |                                                                       | 89 | Entertainment                                                                |
|  | S. Public Management, Social Security and Social Organization         | 90 | Chinese Communist Party Agencies                                             |
|  |                                                                       | 91 | National Institutions                                                        |
|  |                                                                       | 92 | Chinese People's Political Consultative Conference and Democratic Party      |
|  |                                                                       | 93 | Social Security Industries                                                   |
|  |                                                                       | 94 | Mass Organizations, Social Groups and Other Organizations                    |
|  |                                                                       | 95 | Basic Mass Autonomous Organization                                           |
|  | T. International Organization                                         | 96 | International Organization                                                   |
