# Supplementary material
Source: MDPI journal article supplement (https://www.mdpi.com/2071-1050/10/7/2373)
Supplement: s1 [file s1]

**S1 Table.** Match between Chinese industries and US two-digit industries

| Code-GB/T<br>4754-2011 | Chinese industries                                                         | US industries                                         | NAICS(North American<br>Industry Classification System) |
|------------------------|----------------------------------------------------------------------------|-------------------------------------------------------|---------------------------------------------------------|
| 01                     | Agriculture, forestry, animal production<br>and hunting, fishing           | Forestry, Fishing, Hunting<br>and Agriculture Support | 11                                                      |
| 02                     | Mining and quarrying                                                       | Mining                                                | 21                                                      |
| 03                     | Manufacturing                                                              | Manufacturing                                         | 31                                                      |
| 04                     | Production and distribution of electricity<br>heating power, gas and water | Utilities                                             | 22                                                      |
| 05                     | Construction                                                               | Construction                                          | 23                                                      |
| 06                     | Wholesale and retail trade                                                 | Wholesale and retail trade                            | 42,43                                                   |
| 07                     | Transportation, warehousing and post                                       | Transportation and<br>Warehousing                     | 48                                                      |
| 08                     | Hotels and catering services                                               | Accommodation and Food<br>Services                    | 72                                                      |
| 09                     | Information transmission, computer<br>services and software                | Information                                           | 51                                                      |
| 10                     | Finance and Insurance                                                      | Finance and Insurance                                 | 52                                                      |
| 11                     | Real estate                                                                | Real Estate and Rental and<br>Leasing                 | 53                                                      |
| 12                     | Leasing and business services                                              | Professional, Scientific, and<br>Technical Services   | 54                                                      |
| 13                     | Scientific research, technical services                                    | Professional, Scientific, and<br>Technical Services   | 54                                                      |
| 14                     | Management of water conservancy,<br>environment and public facilities      |                                                       |                                                         |
| 15                     | Household services, repair and other<br>services                           |                                                       |                                                         |
| 16                     | Education                                                                  | Educational Services                                  | 61                                                      |
| 17                     | Health, social work                                                        | Health Care and Social<br>Assistance                  | 62                                                      |
| 18                     | Culture, sports and entertainment                                          | Arts, Entertainment, and<br>Recreation                | 71                                                      |
| 19                     | Public management social security and<br>social organization               | Public Administration                                 | 92                                                      |
